# Supplementary material
Source: PubMed Central journal article supplement (PMC1698664)

## Legends of supplemental data

### Figure S1

Low-frequency region of the resonance Raman spectra of the Fe<sup>II</sup>NO complexes of H<sub>4</sub>B-saturated bsNOS in the presence of NOHA and citrulline. The spectra were obtained with NOHA and H<sub>4</sub>B with <sup>14</sup>N<sup>16</sup>O (a) and <sup>15</sup>N<sup>16</sup>O (b). The <sup>14</sup>N<sup>16</sup>O minus <sup>15</sup>N<sup>16</sup>O difference spectrum (a minus b) is shown in e. The spectra of the citrulline- and H<sub>4</sub>B-saturated bsNOS were obtained with <sup>14</sup>N<sup>16</sup>O (c) and <sup>15</sup>N<sup>16</sup>O (d). The <sup>14</sup>N<sup>16</sup>O minus <sup>15</sup>N<sup>16</sup>O difference spectrum (c minus d) is shown in f.

### Figure S2

Determination of the affinity of the ferric form of saNOS for L-arginine. Ferric saNOS (0.5 μM) was titrated with 0.6 μM to 300 μM L-arginine. The fraction of L-arginine-bound protein was calculated from the variations of the absorbance at 421 nm and 380 nm. The solid line represents the fit of the data to equation 1. K<sub>d</sub> was found to be 4.2 ± 0.2 μM. The inset shows the titration over the complete set of L-arginine concentrations.

### Figure S3

Kinetics of NO recombination to saNOS determined by flash photolysis. The rates of NO association to saNOS (solid squares) and to saNOS saturated with L-arginine (solid circles) are plotted as a function of the NO concentration. The solid lines represent the linear fit to these data. The goodness of the fits is shown by an r<sup>2</sup> of 0.998 for the saNOS data and 0.995 for the saNOS/Arg data. From these fits, the calculated k<sub>on</sub> for NO were 17 and 2 μM<sup>-1</sup>s<sup>-1</sup> for saNOS and saNOS/Arg, respectively. The calculated k<sub>off</sub> were 1266 s<sup>-1</sup> and 34 s<sup>-1</sup> for saNOS and saNOS/Arg, respectively.

Figure S4

High-frequency region of the resonance Raman spectra of Fe<sup>II</sup>NO complexes of bsNOS. The L-arginine sample (a) and the substrate-free and pterin-free sample (b) are shown. The inset shows the optical absorption spectra of the L-arginine sample (dashed line) and the substrate-free and pterin-free sample (solid line).

Figure S1

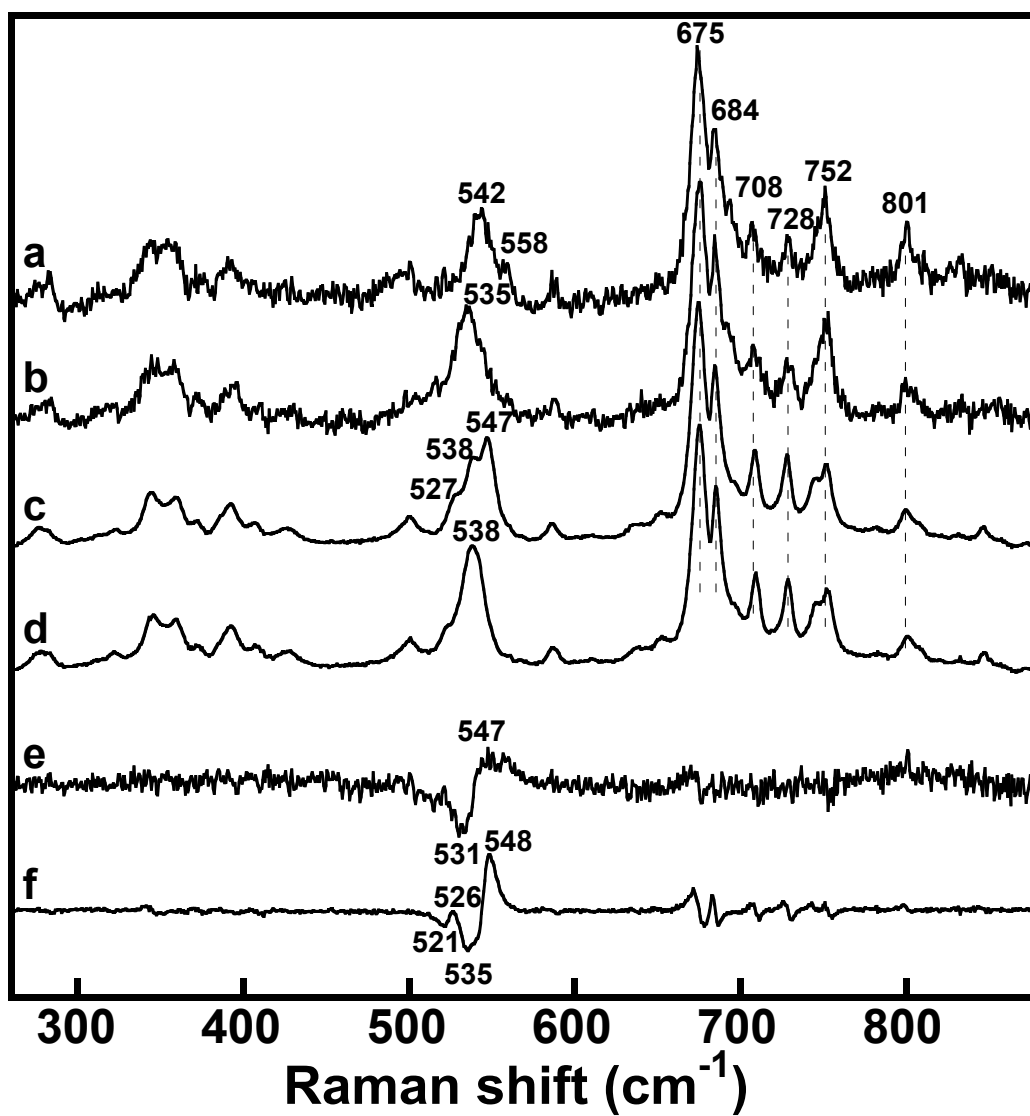

Figure S2

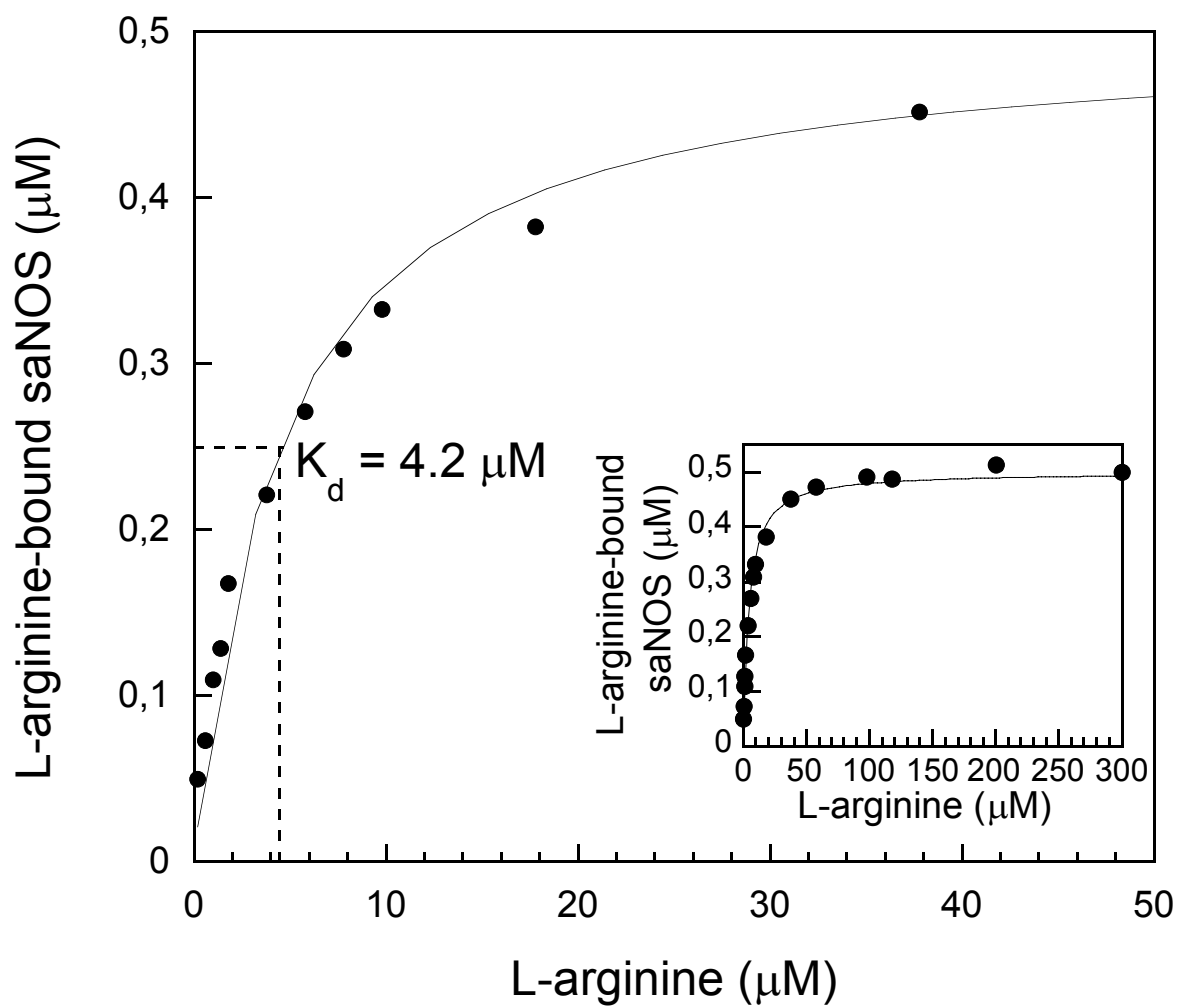

Figure S3

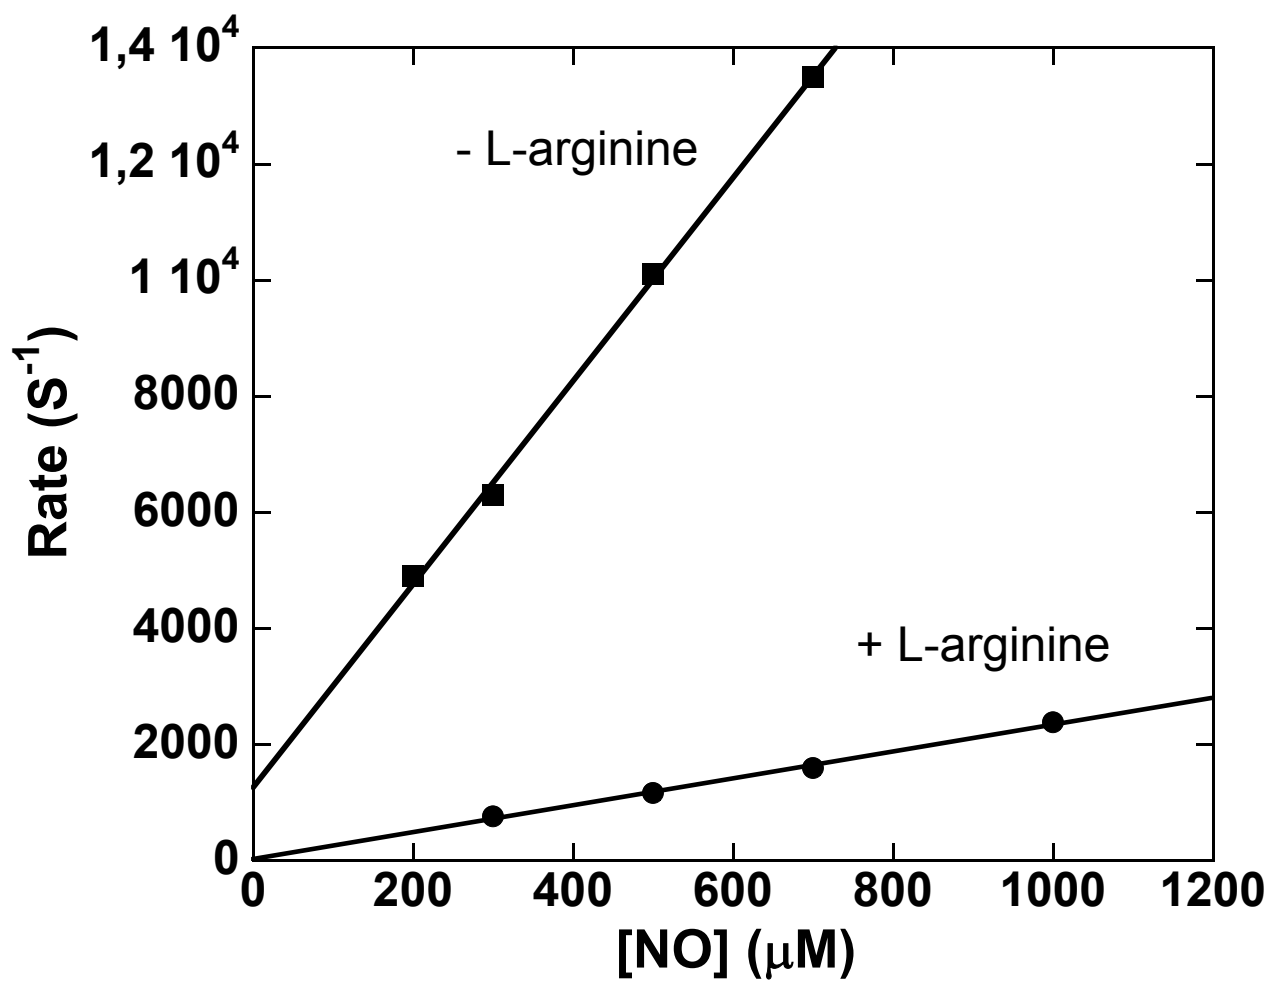

Figure S4

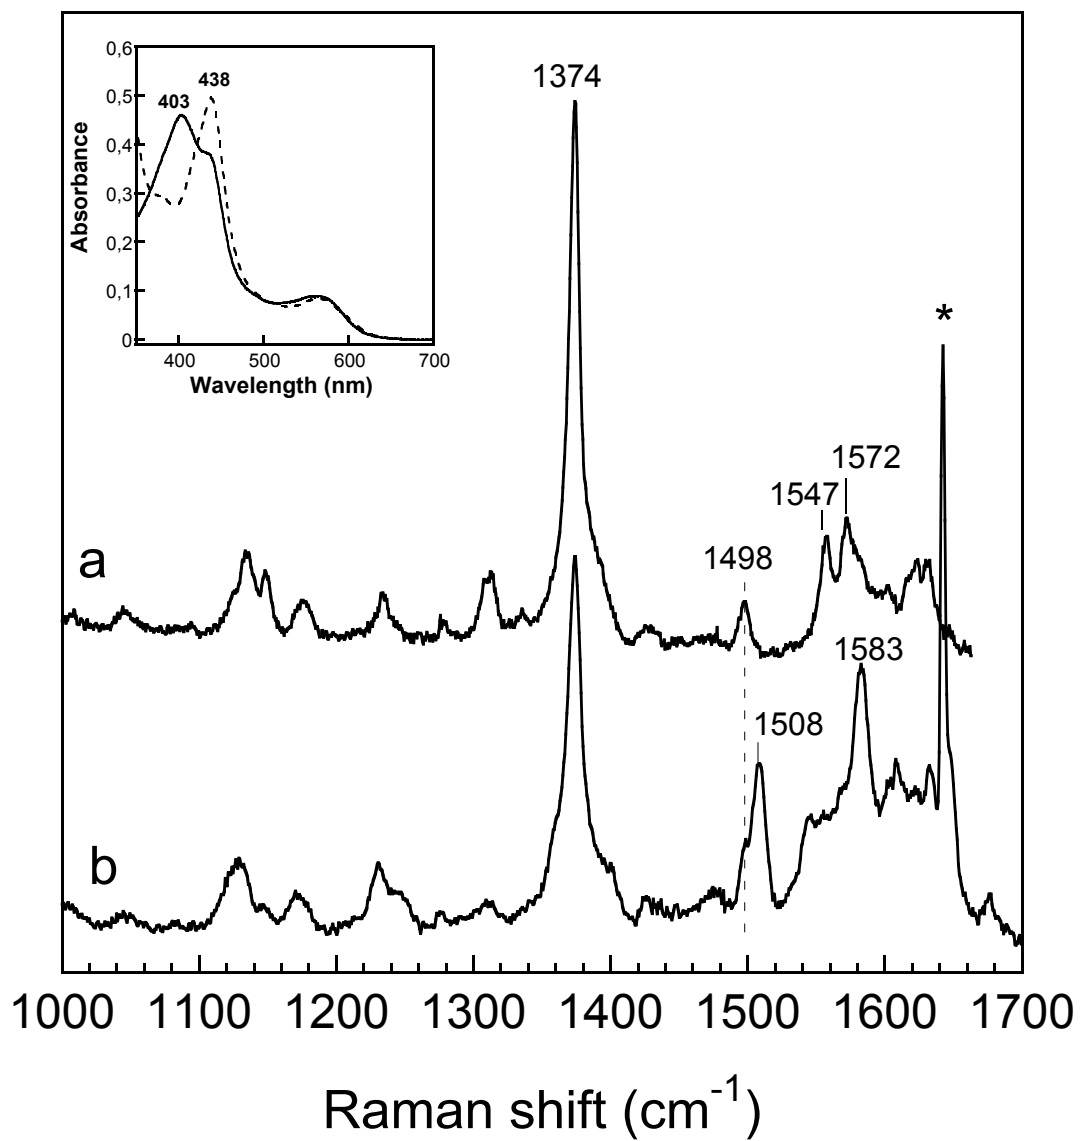

Supplement: bj4010235add.pdf [file bj4010235add.pdf]
